# Supplementary material for: MetaDecoder: a novel method for clustering metagenomic contigs
Source: PubMed Central journal article supplement (PMC8908641; doi:10.1186/s40168-022-01237-8), 2022-03-10
Supplement: 40168_2022_1237_MOESM11_ESM.pdf [file 40168_2022_1237_MOESM11_ESM.pdf]

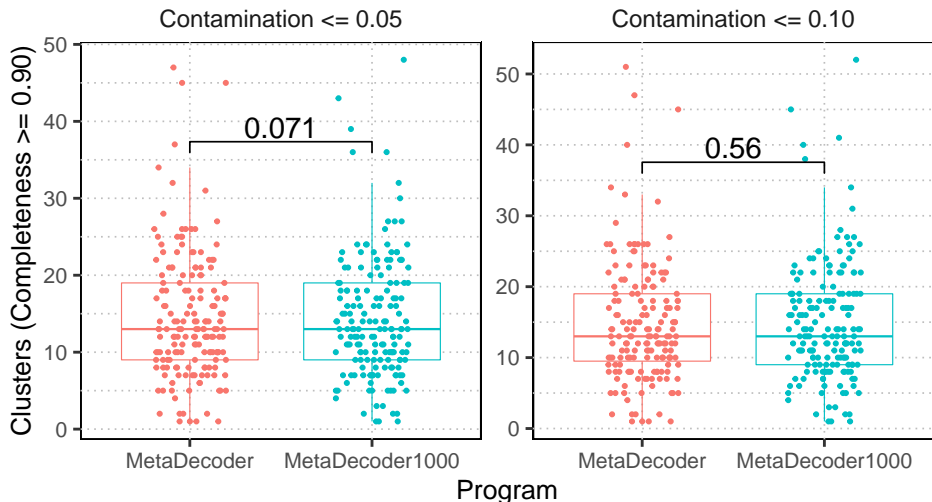

**Supplementary Figure S11.** Clustering benchmarks of MetaDecoder under different contig length thresholds. MetaDecoder with default length threshold (2.5 Kb) and 1 Kb (MetaDecoder1000) were applied on all real-world samples (*i.e.*, two samples from high-CO<sub>2</sub> cold-water geyser, 24 HMP samples and 145 samples from a cohort of T2D study), respectively. Cluster number (completeness  $\geq 0.90$ ) of each sample was shown at two contamination levels. Significance was determined using the Wilcoxon matched-pairs signed rank test.
